# Supplementary material for: Body composition reference charts for UK infants and children aged 6 weeks to 5 years based on measurement of total body water by isotope dilution
Source: PubMed Central journal article supplement (PMC6949189; doi:10.1038/s41430-019-0409-x), 2019-02-26
Supplement: 41430_2019_409_MOESM1_ESM.pdf [file 41430_2019_409_MOESM1_ESM.pdf]

### Supplementary online material

Body composition reference charts for UK infants and children aged 6 weeks to 5 years based on measurement of total body water by isotope dilution; Wells et al.

**Supplementary online Figure 1.** Centiles generated by (a) the best fit according to the Bayesian Information Criterion, and (b) a simpler model with fewer degrees of freedom in order to correct for sampling bias over the age range 3 to 5 years

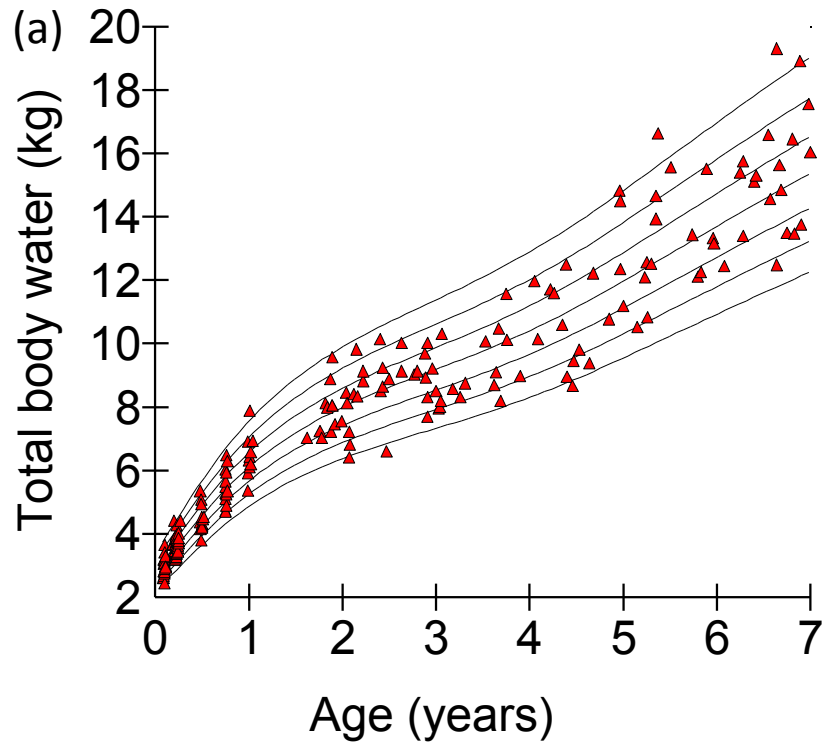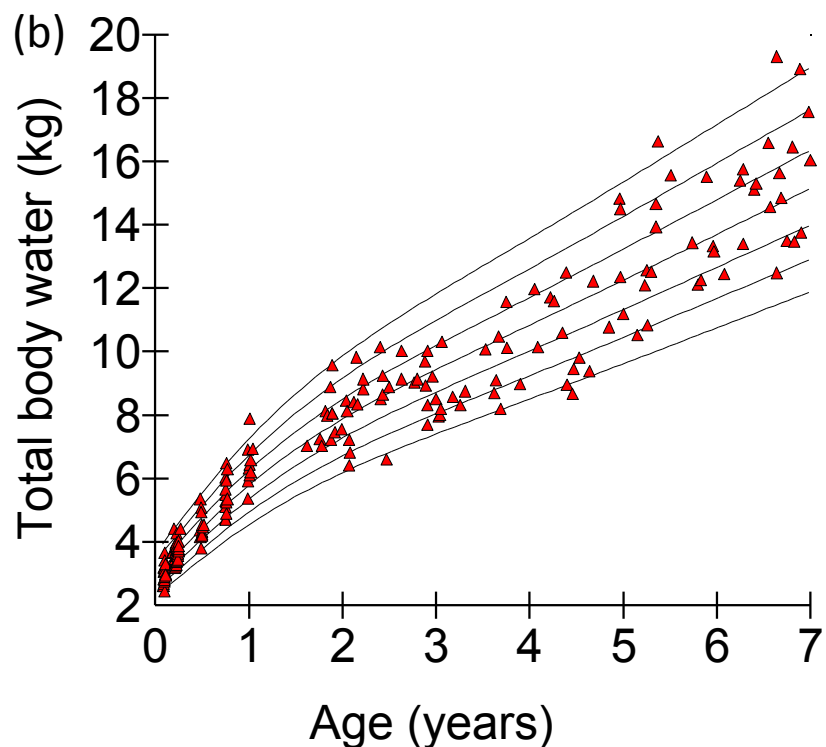

**Supplementary online Figure 2.** Total body water reference curves for new data <5 years and published data >5 years Wells et al., Am J Clin Nutr 2012; 96(6):1316-26

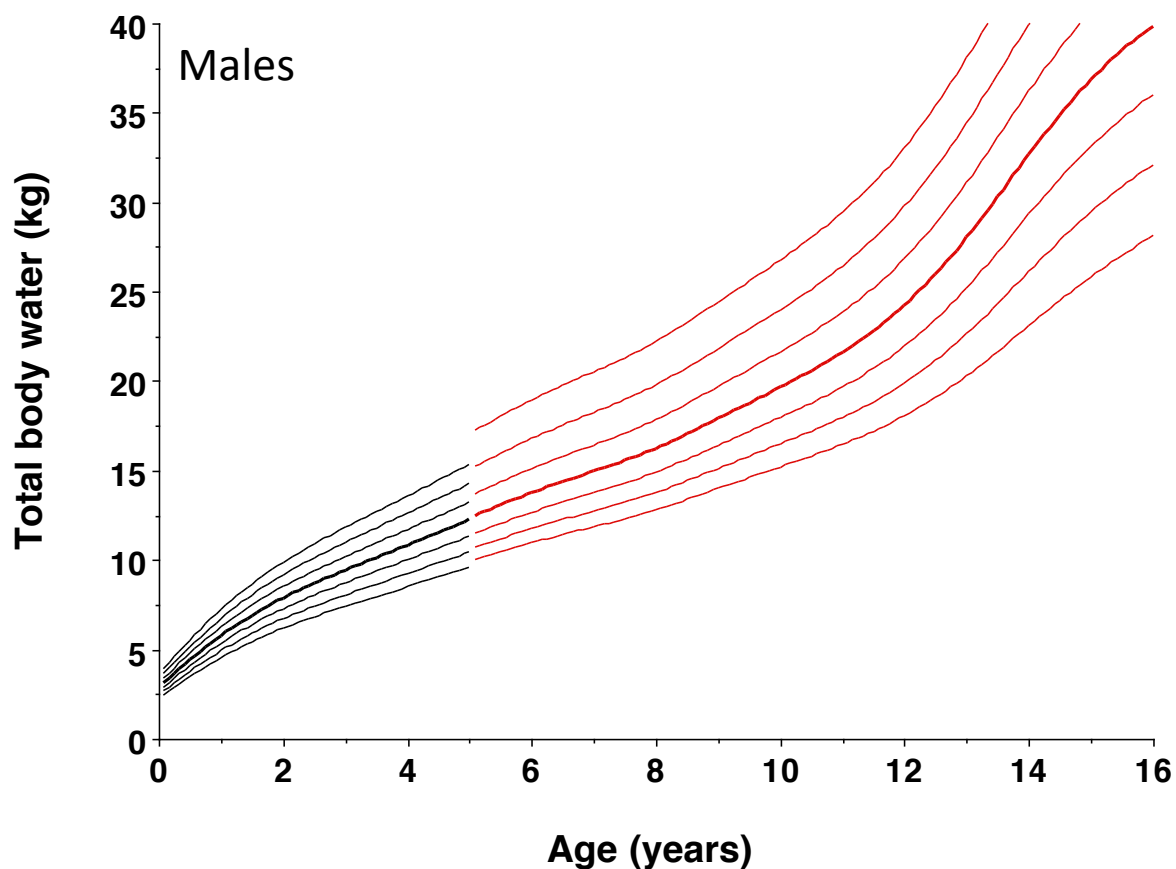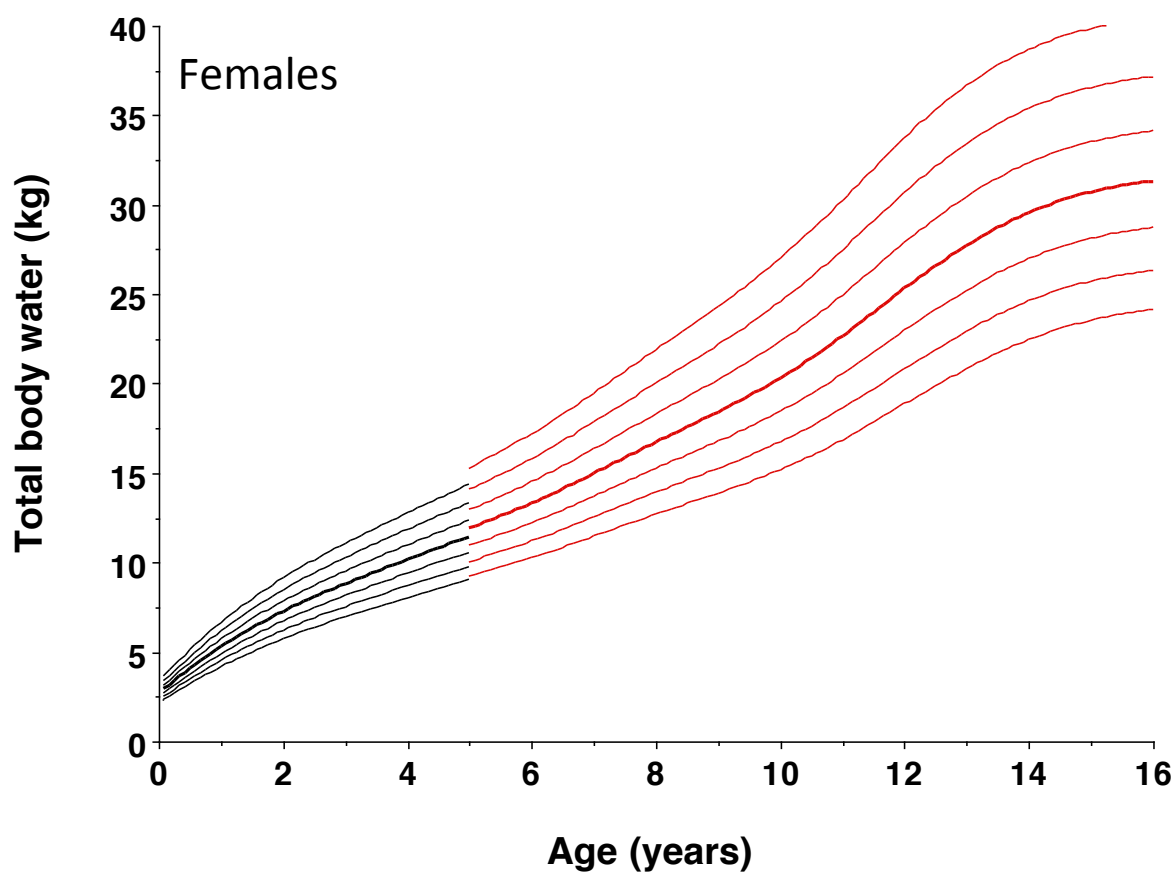

**Supplementary online Table 1.****Numbers of infants and children analysed by age for each sex**

|                  | Males (n) | Females (n) | Sexes combined (n) |
|------------------|-----------|-------------|--------------------|
| 1.5 months       | 20        | 29          | 49                 |
| 3 months         | 41        | 51          | 92                 |
| 6 months         | 13        | 24          | 37                 |
| 9 months         | 13        | 25          | 38                 |
| 12 months        | 10        | 8           | 18                 |
| 1.5 – 1.99 years | 12        | 10          | 22                 |
| 2 - 2.99 years   | 25        | 23          | 48                 |
| 3 - 3.99 years   | 16        | 20          | 36                 |
| 4 - 4.99 years   | 16        | 10          | 26                 |
| 5 - 5.99 years   | 16        | 15          | 31                 |
| 6 - 6.99 years   | 18        | 21          | 39                 |
| 7 - 7.50 years   | 11        | 16          | 27                 |
| Total            | 211       | 252         | 463                |

All measurements represented new data points, except that those measured at 1.5 months were re-measured at 3, 6 and 9 months. The numbers of these repeat measurements were 50 at 3 months (54% of the sample), 37 at 6 months (100% of the sample), and 22 at 9 months (58% of the sample).
